# Supplementary material
Source: PubMed Central journal article supplement (PMC4044710)

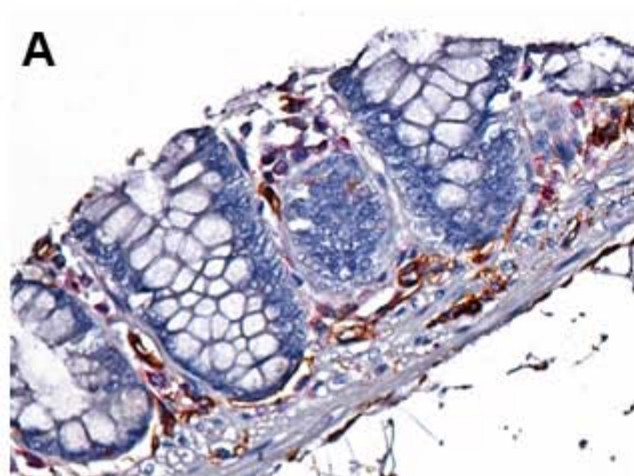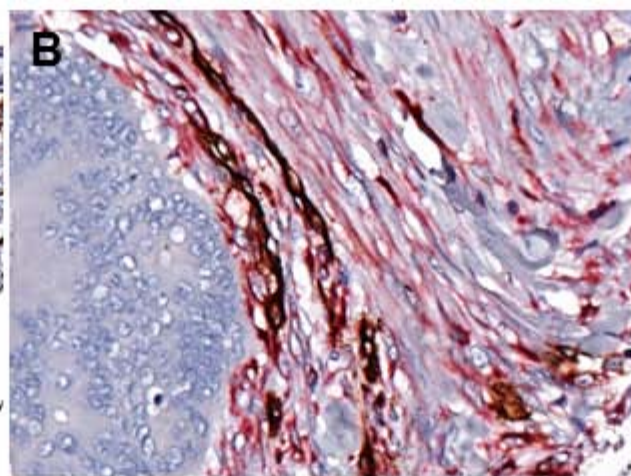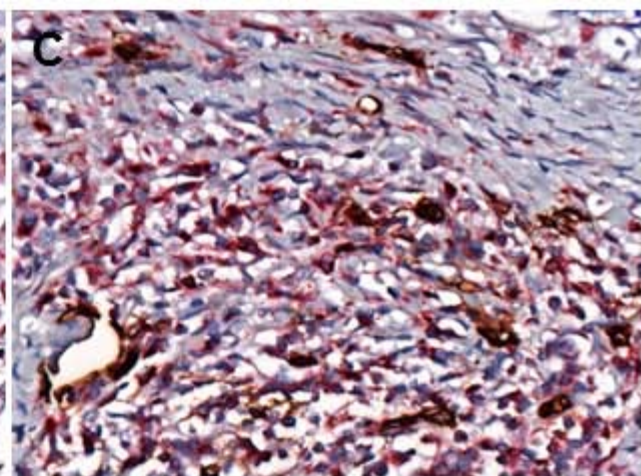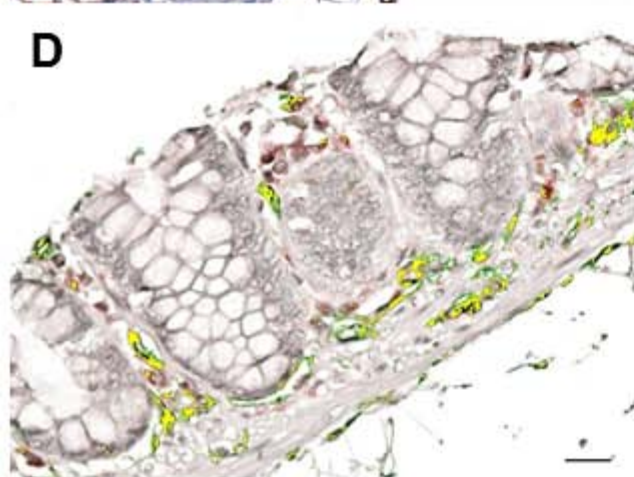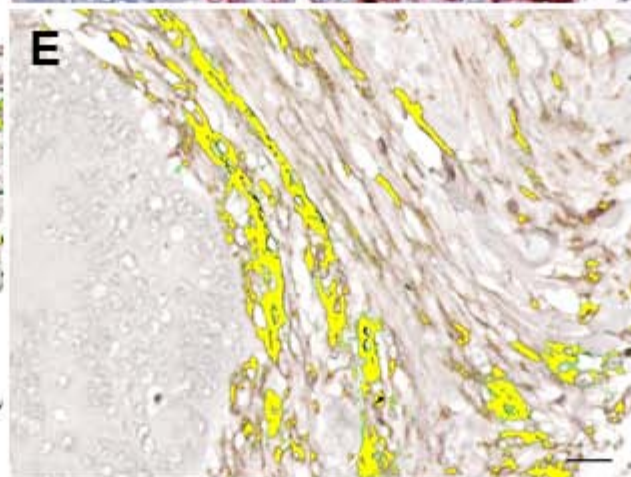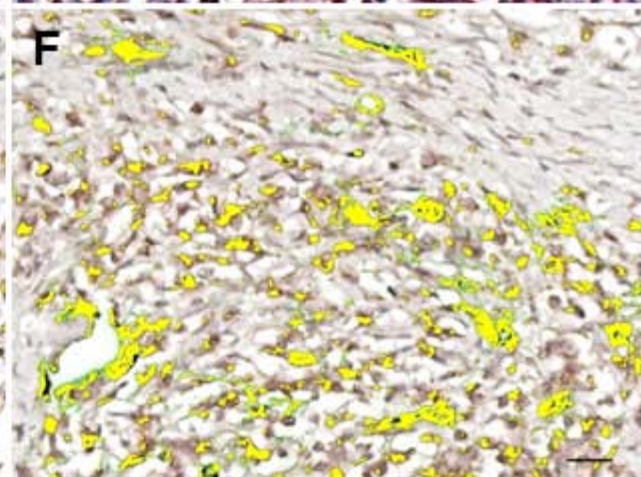

Supplementary Fig. 1

Supplement: mmc1.pdf [file mmc1.pdf]

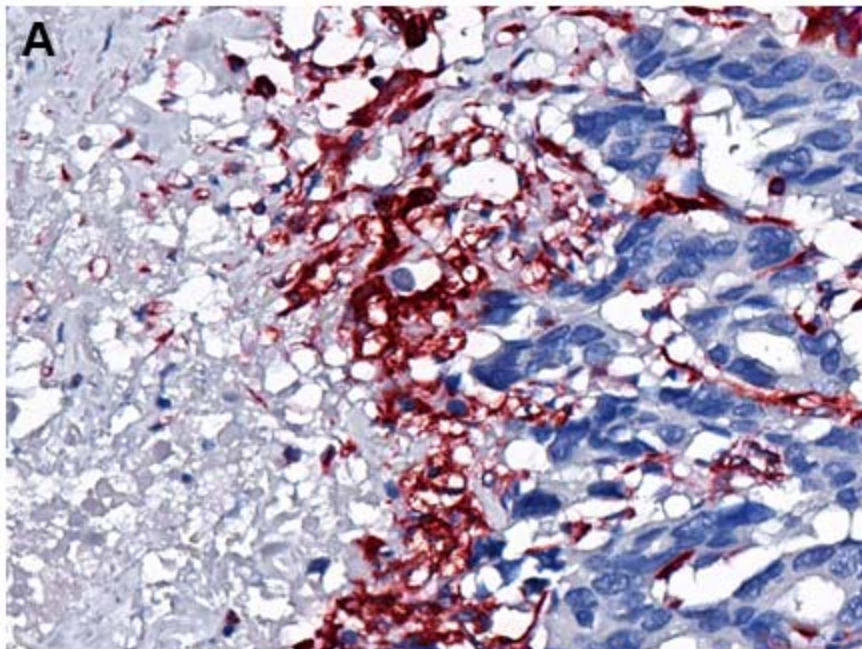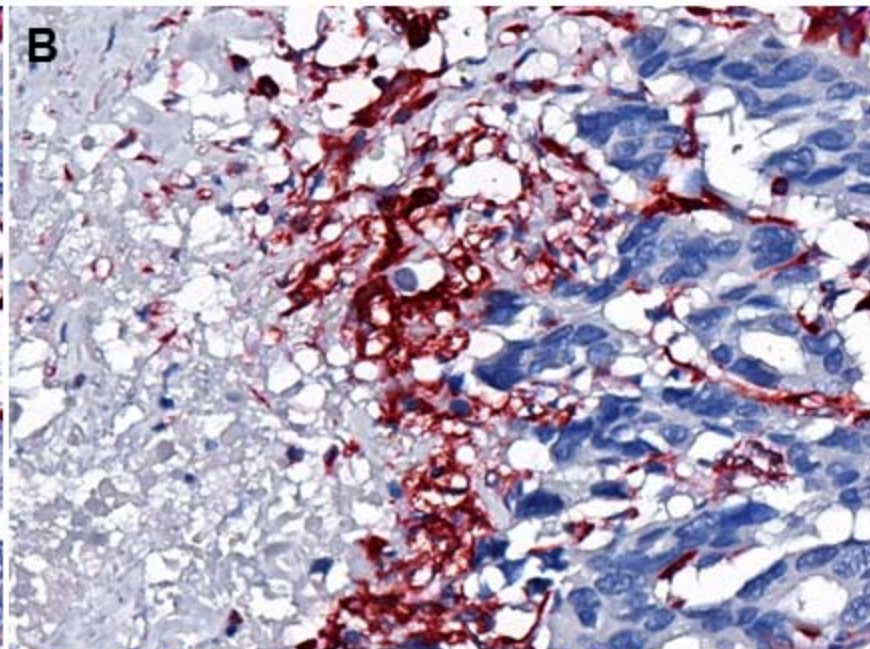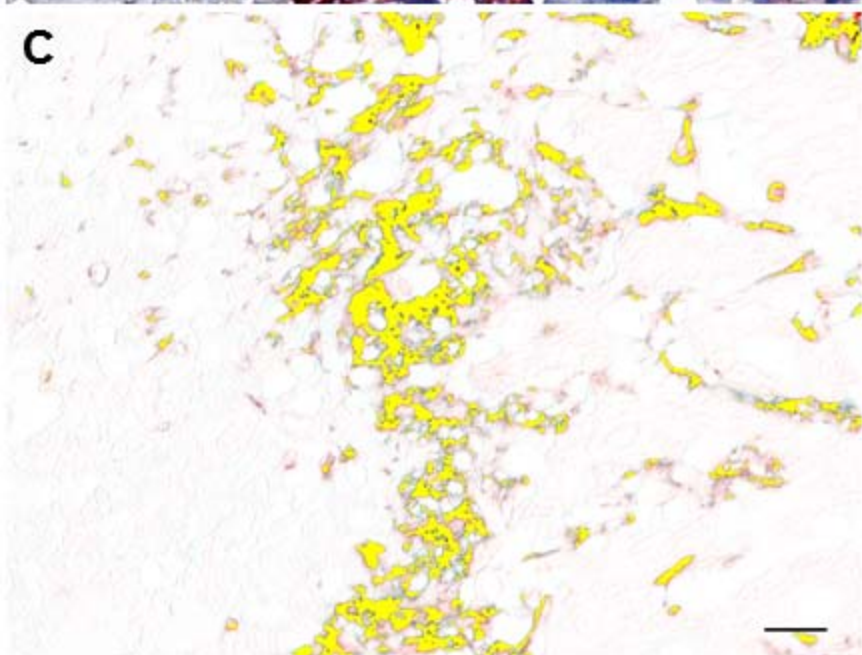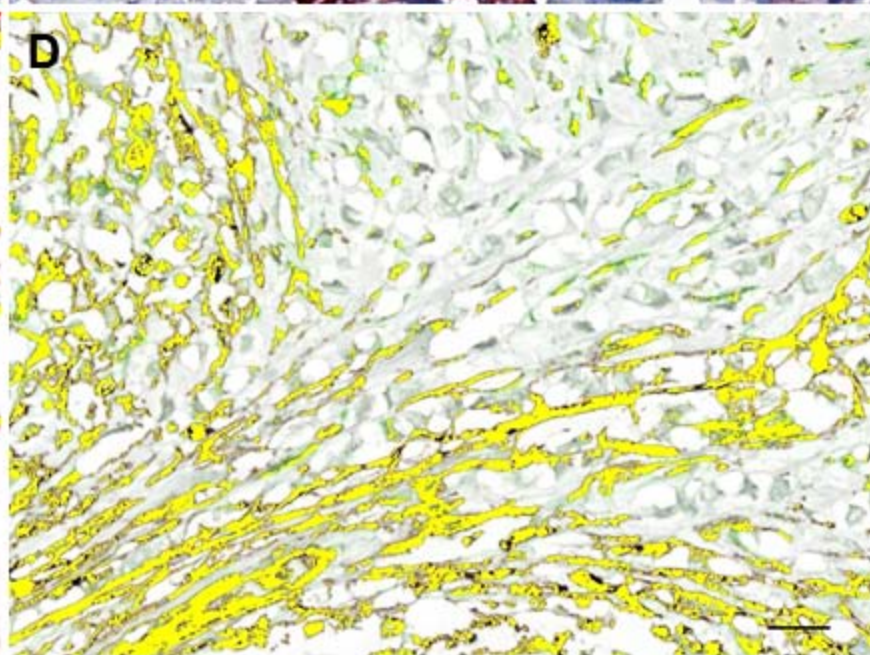

Supplementary Fig. 2

Supplement: mmc2.pdf [file mmc2.pdf]

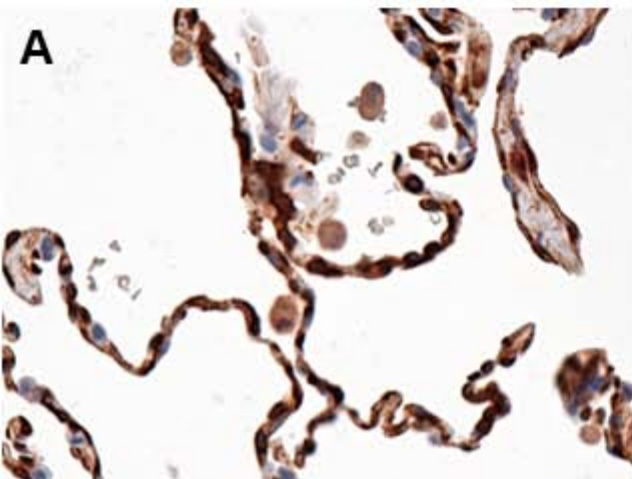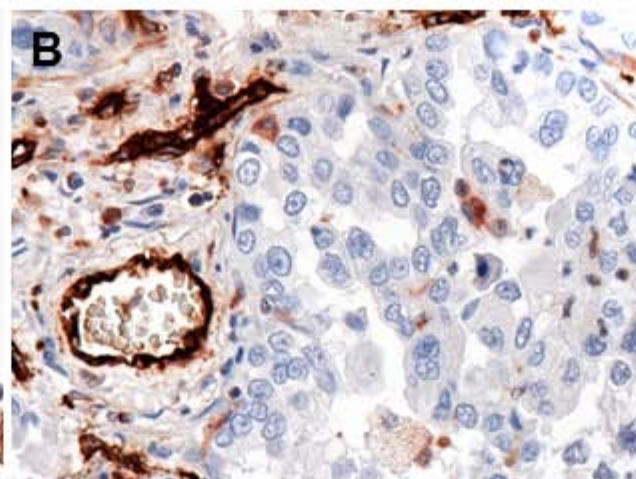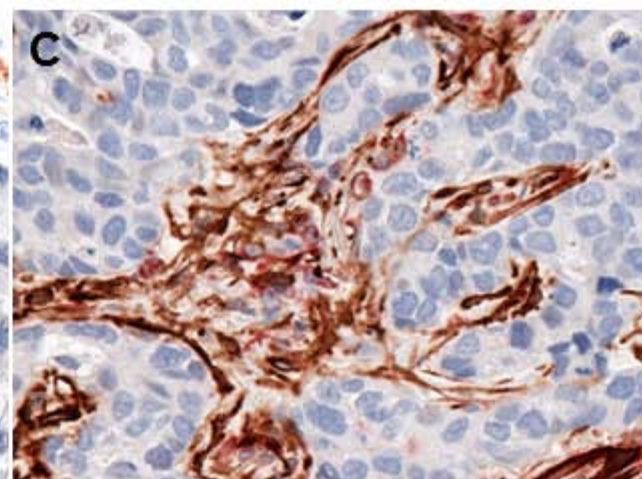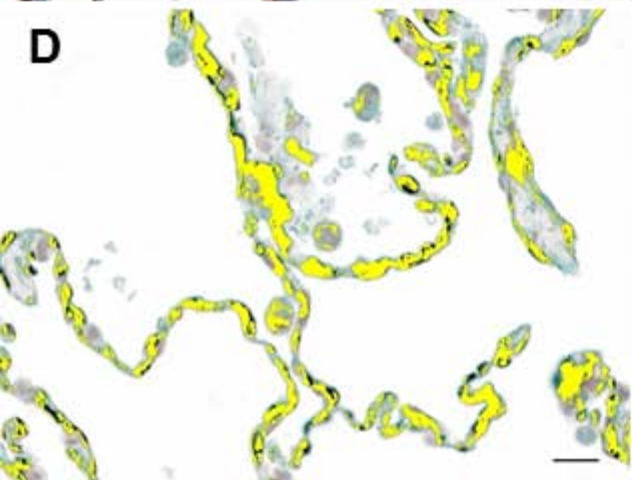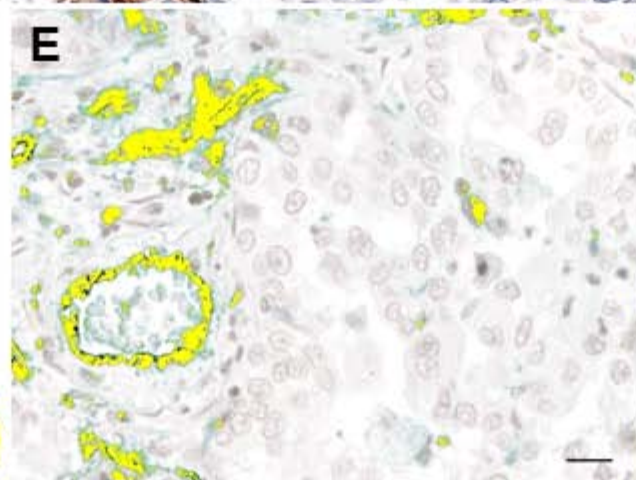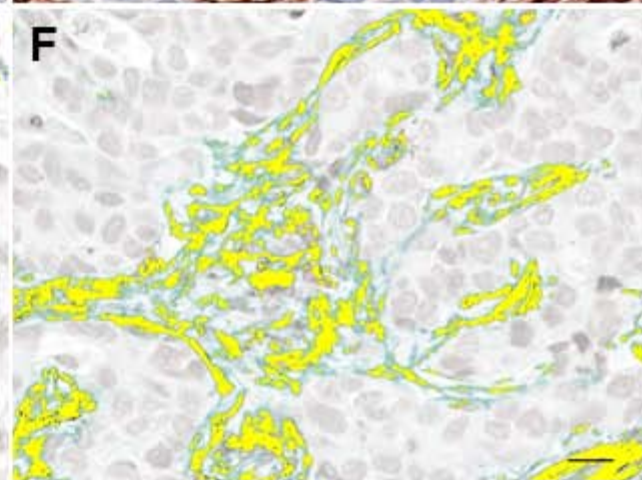

Supplementary Fig. 3

Supplement: mmc3.pdf [file mmc3.pdf]

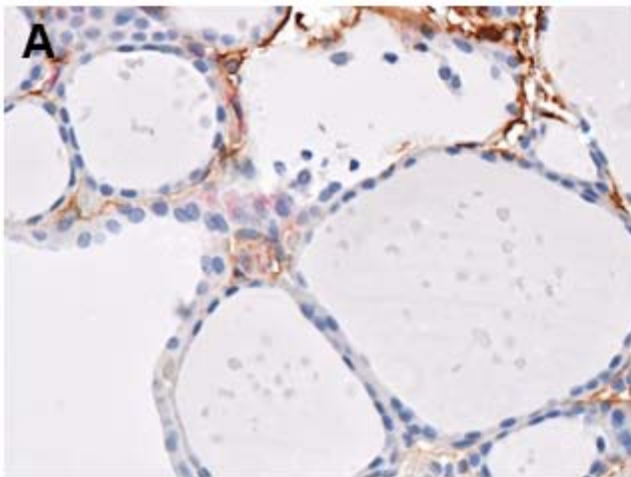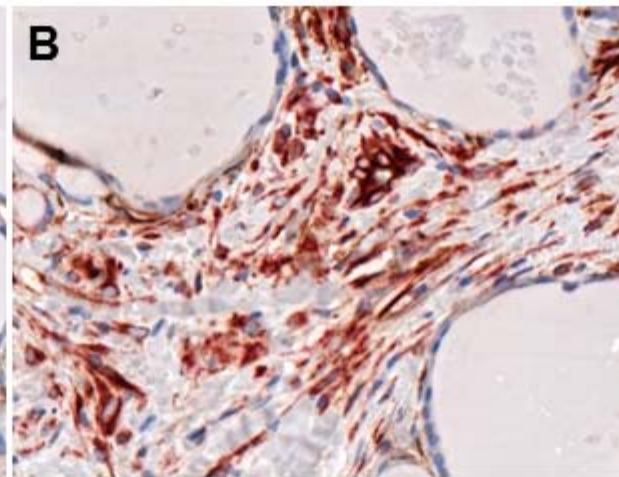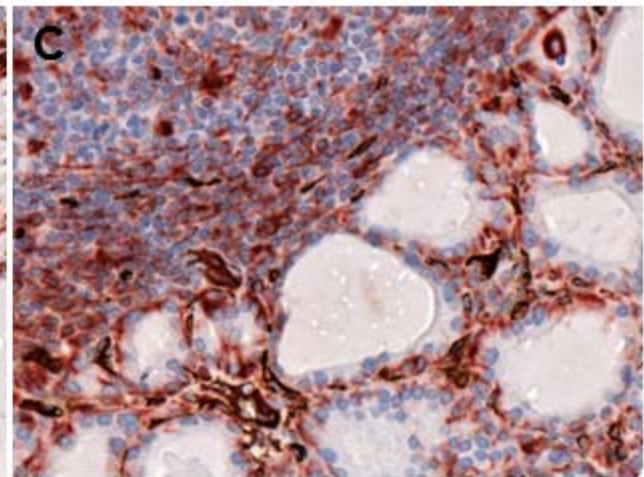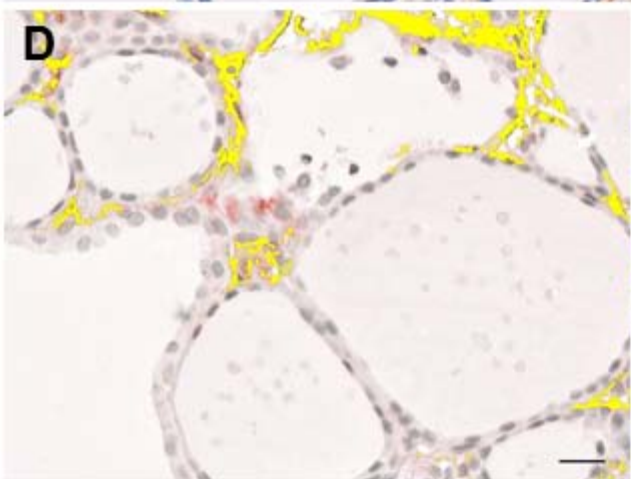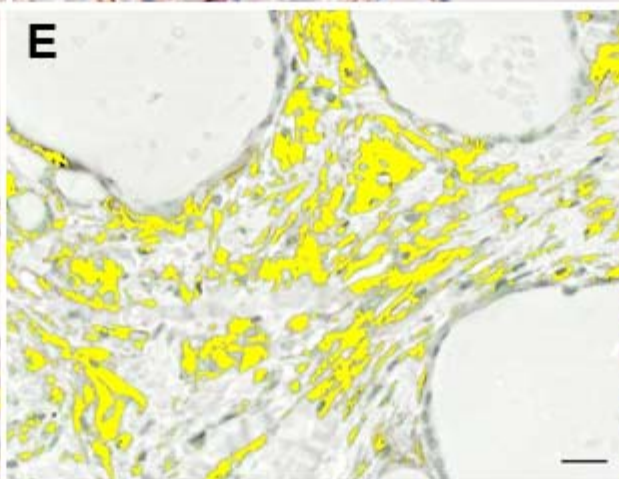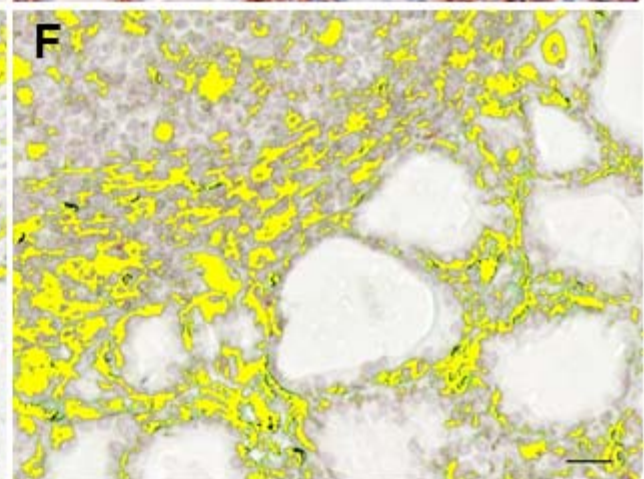

Supplementary Fig. 4

Supplement: mmc4.pdf [file mmc4.pdf]

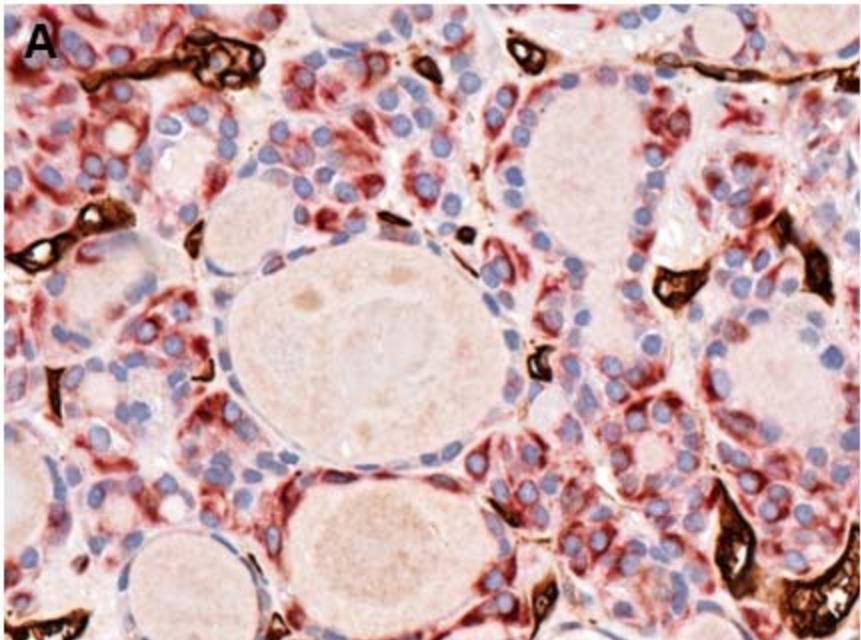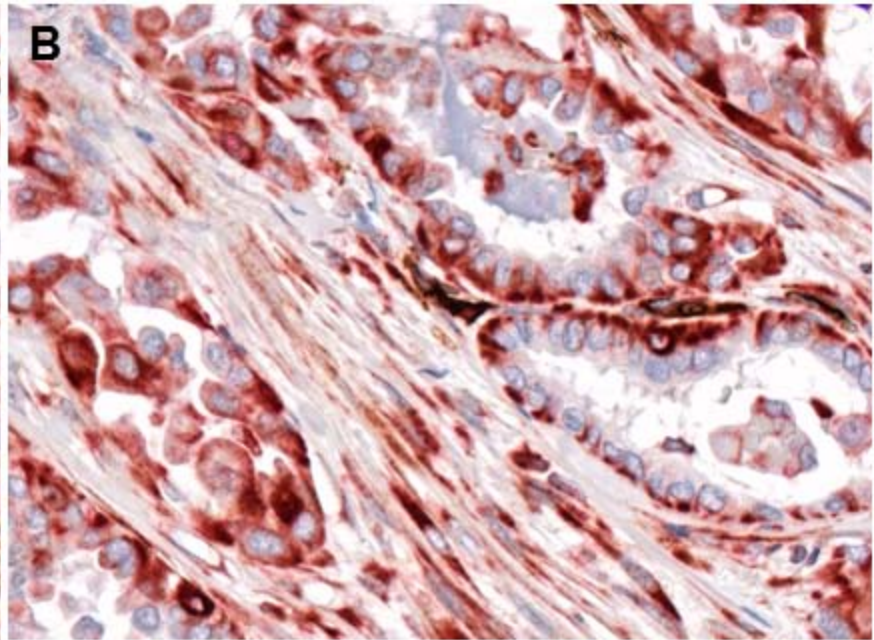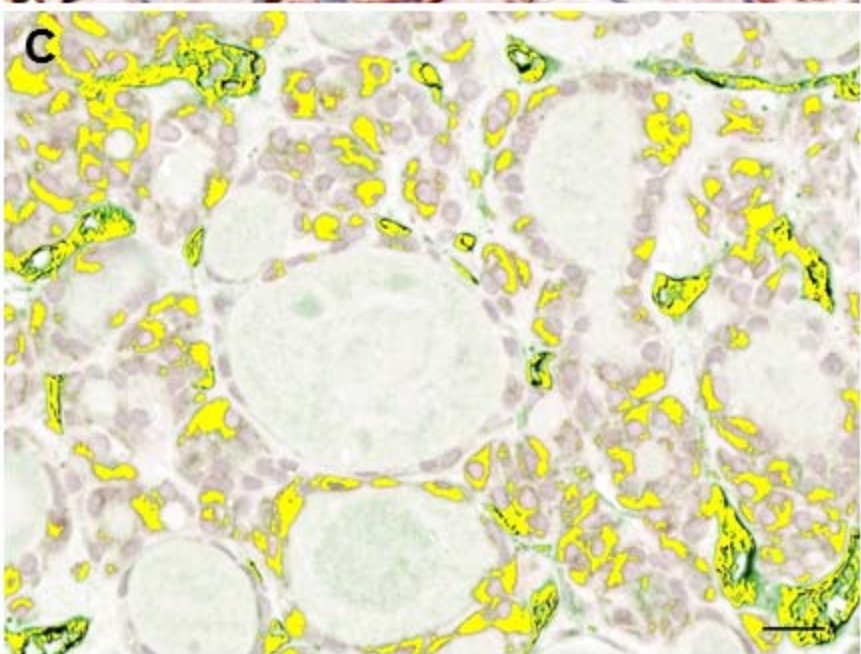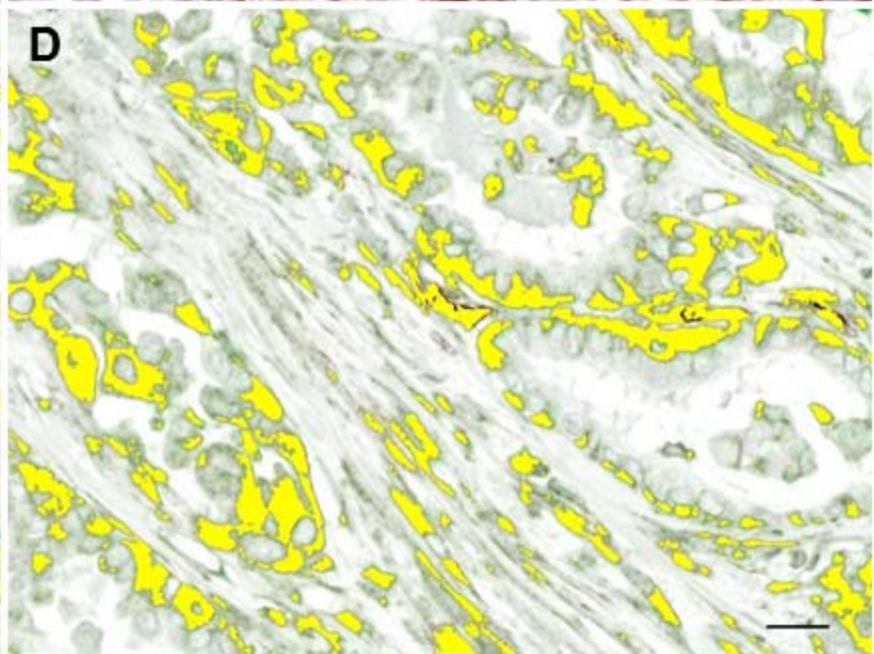

Supplementary Fig. 5

Supplement: mmc5.pdf [file mmc5.pdf]
